# Supplementary material
Source: PubMed Central journal article supplement (PMC6007105)
Supplement: AEM.00363-18_zam013188574s2.pdf [file AEM.00363-18_zam013188574s2.pdf]

**FIG. S1** SDS-PAGE gel picture of *E. coli* cell free extract (CFE) containing the heterologous expressed malate dehydrogenase (MDH) candidates. NC, empty vector negative control; MDH, the identified malate dehydrogenase (CDQ83\_08825, theoretical pI/Mw: 6.23/34.5 kD); LDH, the identified lactate dehydrogenase (CDQ83\_04860, theoretical pI/Mw: 5.92/35.0 kD).

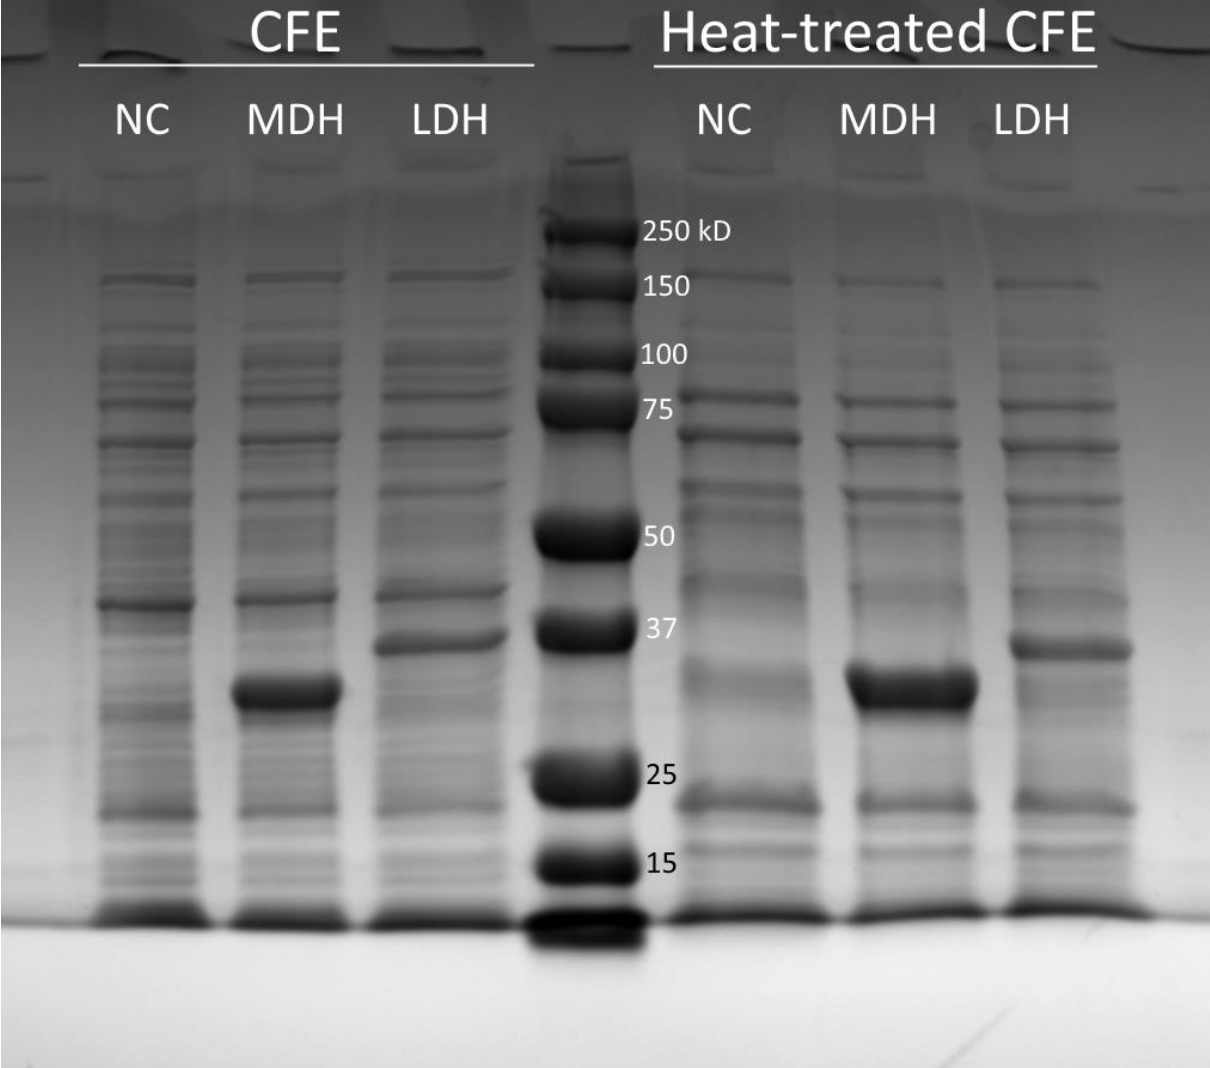

**TABLE S2** Genes with at least four times higher expression during growth of *C. thermosuccinogenes* on xylose versus glucose, based on RPKM values.

| Locus Tag   | Function                              | RPKM<br>on glucose | RPKM<br>on xylose | Differential<br>expression |
|-------------|---------------------------------------|--------------------|-------------------|----------------------------|
| CDQ83_14310 | LacI family transcriptional regulator | 4.39               | 370               | 84.14                      |
| CDQ83_08695 | hypothetical protein                  | 4.11               | 288               | 70.20                      |
| CDQ83_14315 | xylulokinase                          | 14.9               | 772               | 51.73                      |
| CDQ83_14305 | fucose isomerase                      | 79.2               | 3237              | 40.86                      |
| CDQ83_14295 | hypothetical protein                  | 0.61               | 13.1              | 21.40                      |
| CDQ83_02405 | hypothetical protein                  | 18.8               | 355               | 18.87                      |
| CDQ83_13120 | hypothetical protein                  | 14.8               | 214               | 14.48                      |
| CDQ83_09380 | peptidase                             | 0.07               | 0.82              | 12.06                      |
| CDQ83_12280 | hypothetical protein                  | 0.91               | 7.47              | 8.25                       |
| CDQ83_13125 | oxidoreductase                        | 26.7               | 207               | 7.75                       |
| CDQ83_02410 | DeoR family transcriptional regulator | 40.3               | 264               | 6.55                       |
| CDQ83_11930 | hypothetical protein                  | 0.15               | 0.95              | 6.22                       |
| CDQ83_02480 | peptidase                             | 0.21               | 1.22              | 5.84                       |
| CDQ83_11920 | hypothetical protein                  | 0.13               | 0.70              | 5.45                       |
| CDQ83_05240 | hypothetical protein                  | 0.21               | 1.00              | 4.67                       |
| CDQ83_12755 | holin                                 | 0.24               | 1.05              | 4.28                       |
| CDQ83_02250 | hypothetical protein                  | 4.82               | 20.6              | 4.26                       |
| CDQ83_08065 | hypothetical protein                  | 413                | 1748              | 4.24                       |
| CDQ83_09340 | phage tail protein                    | 0.17               | 0.68              | 4.08                       |
| CDQ83_11905 | hypothetical protein                  | 0.64               | 2.56              | 4.02                       |
